# Supplementary material for: Formation and Diffusion of Metal Impurities in Perovskite Solar Cell Material CH3NH3PbI3: Implications on Solar Cell Degradation and Choice of Electrode
Source: PubMed Central journal article supplement (PMC5827569; doi:10.1002/advs.201700662), 2017-12-27
Supplement: ADVS-5-1700662-s001.pdf [file ADVS-5-1700662-s001.pdf]

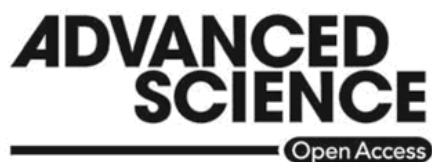

## Supporting Information

for *Adv. Sci.*, DOI: 10.1002/advs.201700662

Formation and Diffusion of Metal Impurities in Perovskite Solar Cell Material  $\text{CH}_3\text{NH}_3\text{PbI}_3$ : Implications on Solar Cell Degradation and Choice of Electrode

*Wenmei Ming, Dongwen Yang, Tianshu Li, Lijun Zhang,\* and Mao-Hua Du\**

**Supporting Information**

**Formation and diffusion of metal impurities in perovskite solar cell material**

**CH<sub>3</sub>NH<sub>3</sub>PbI<sub>3</sub>: implications on solar cell degradation**

**and choice of electrode**

Wenmei Ming<sup>1,†</sup>, Dongwen Yang<sup>2,†</sup>, Tianshu Li,<sup>2</sup> Lijun Zhang<sup>2,3</sup>, and Mao-Hua Du<sup>1</sup>

<sup>1</sup>Materials Science and Technology Division, Oak Ridge National Laboratory, Oak Ridge, TN  
37831, USA

<sup>2</sup>Key Laboratory of Automobile Materials of MOE and Department of Materials Science and  
Engineering, Jilin University, Changchun 130012, China

<sup>3</sup>State Key Laboratory of Superhard Materials, Jilin University, Changchun 130012, China

<sup>†</sup>Both authors contributed equally to this work.

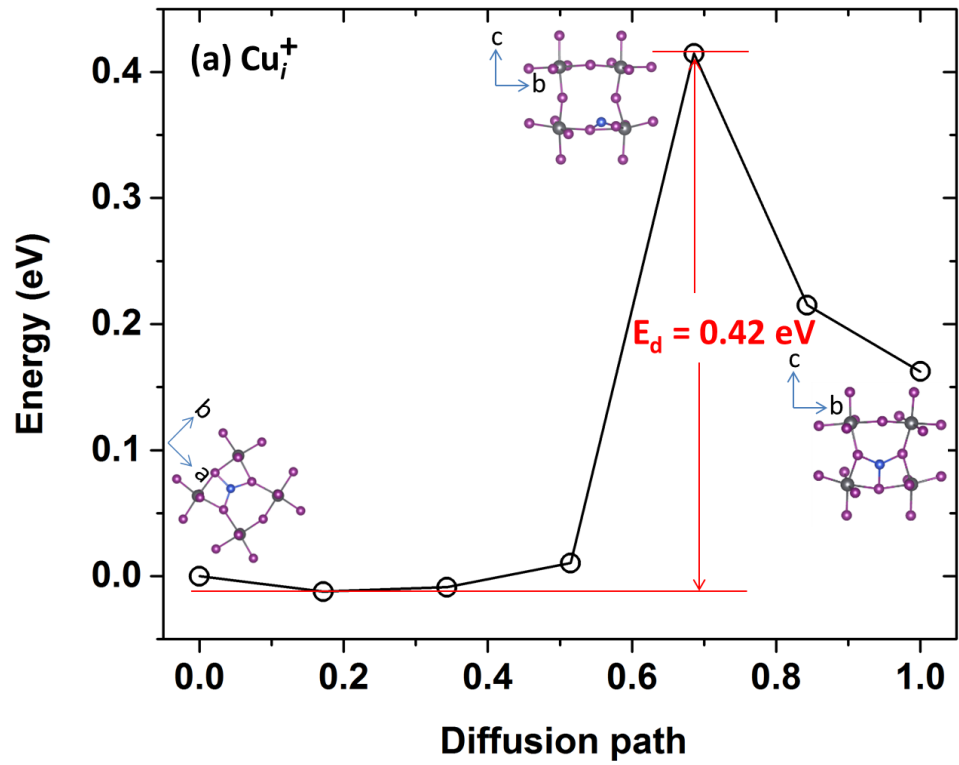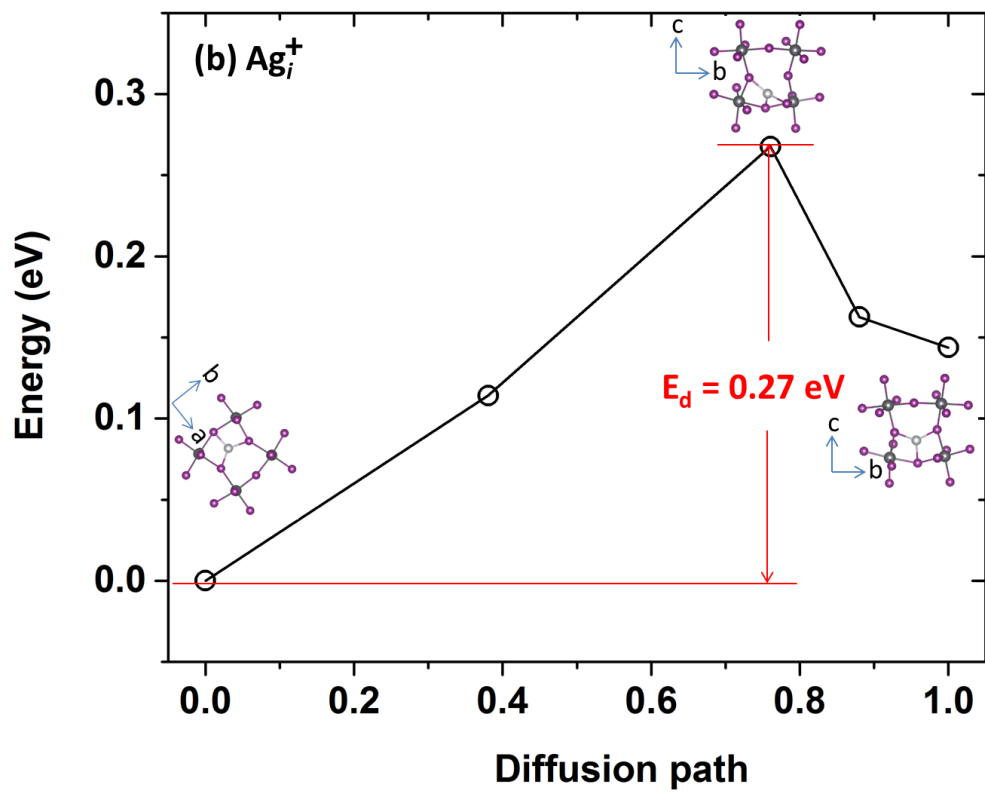

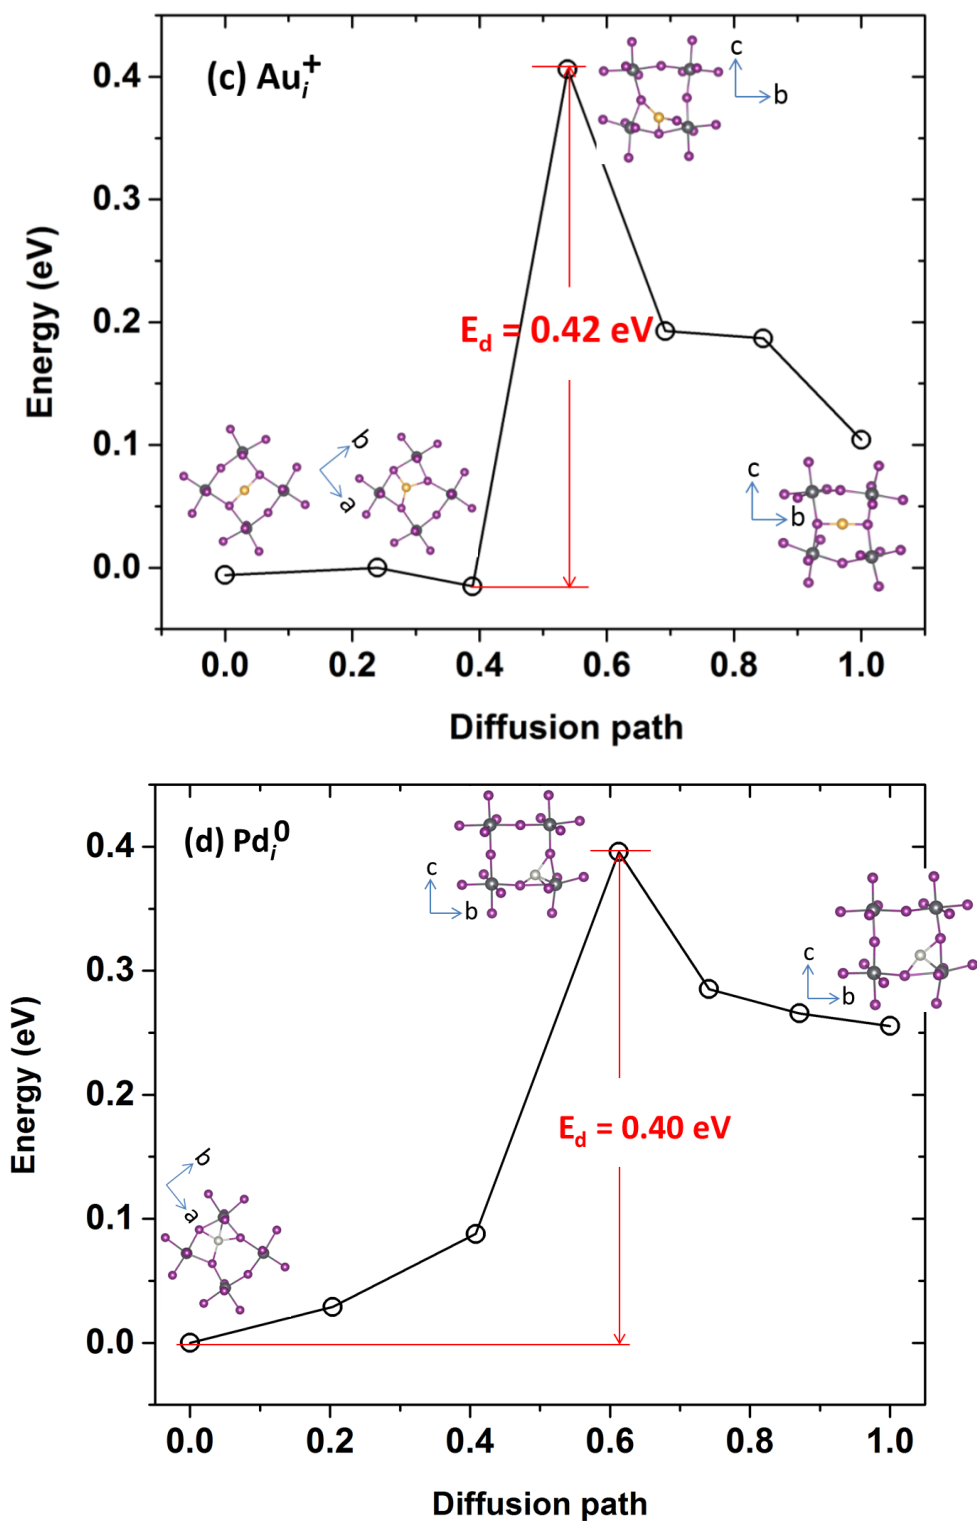

**Figure S1.** Diffusion path and rate limiting barrier  $E_d$  of (a)  $\text{Cu}_i^+$ , (b)  $\text{Ag}_i^+$ , (c)  $\text{Au}_i^+$  and (d)  $\text{Pd}_i^0$ . The local structures around the impurity at its metastable sites and transition state sites along the diffusion path are given in the inset. The corresponding orientations of the structures are provided by the coordinate axis labeled with each case.

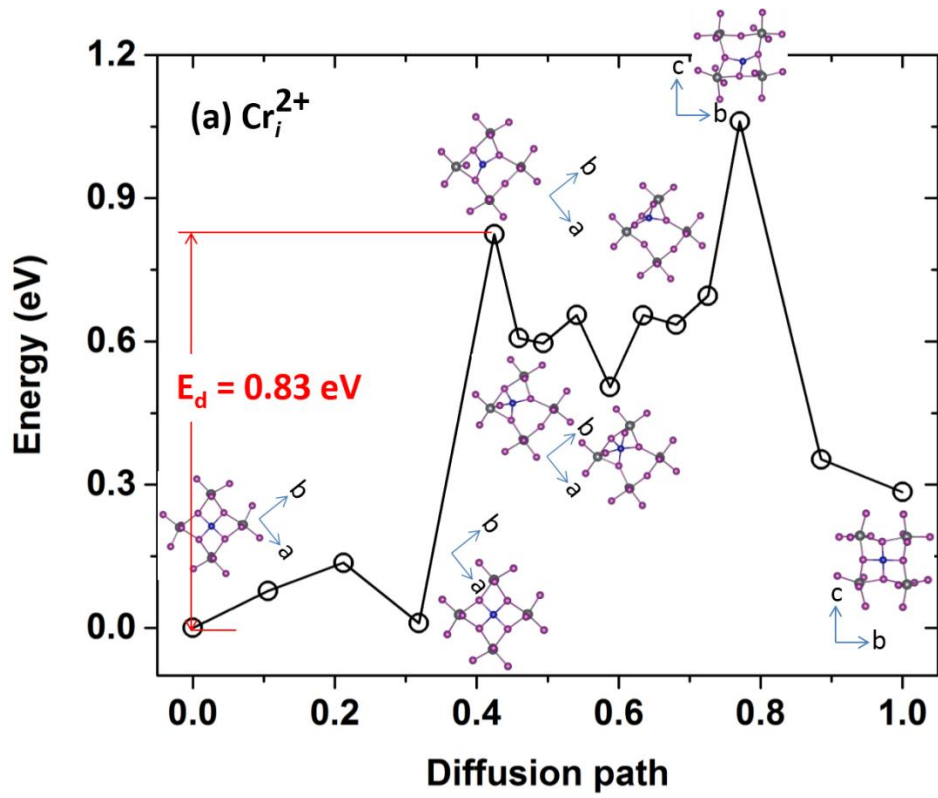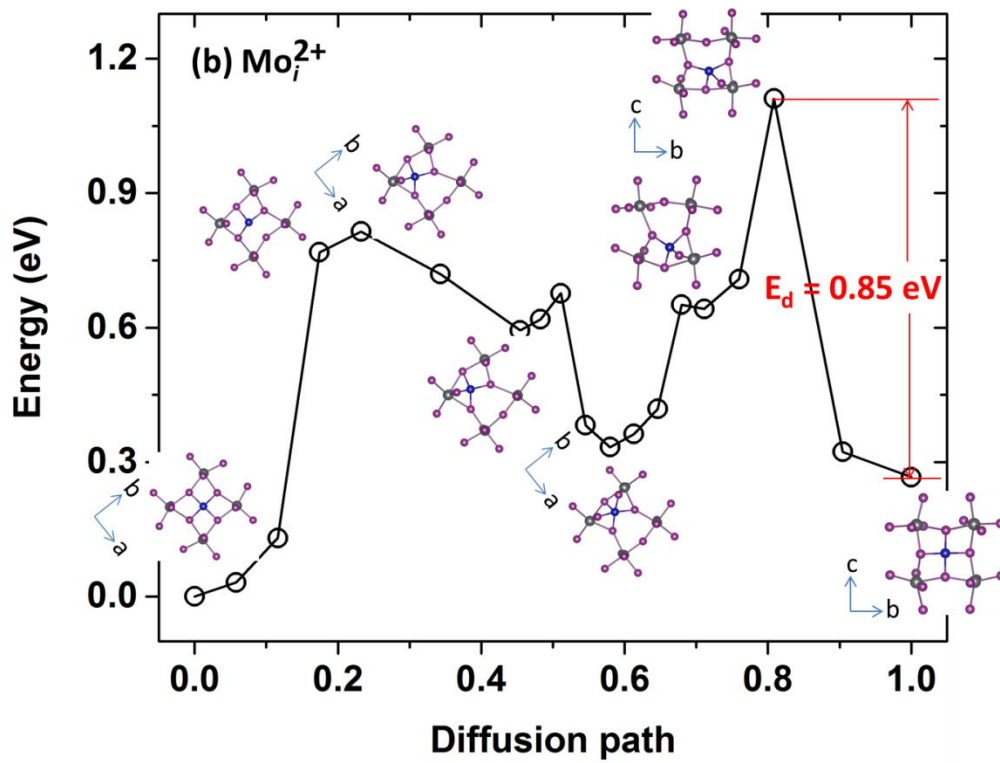

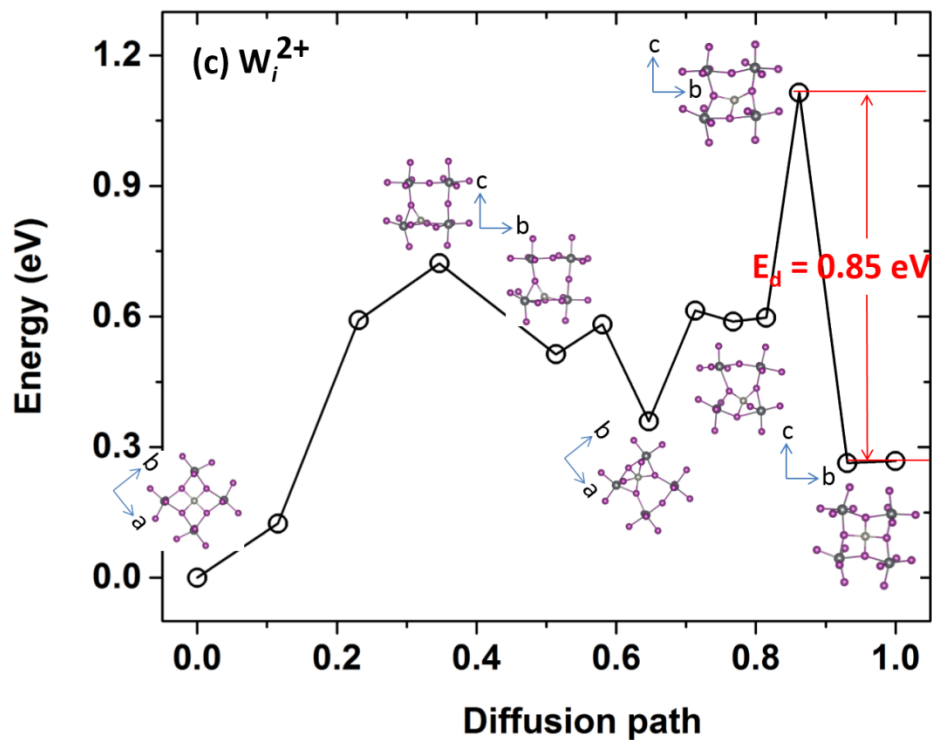

**Figure S2.** Diffusion path and rate limiting barrier  $E_d$  of (a)  $Cr_i^{2+}$ , (b)  $Mo_i^{2+}$ , and (c)  $W_i^{2+}$ . The local structures around the impurity at its metastable sites and transition state sites along the diffusion path are given in the inset. The corresponding orientations of the structures are provided by the coordinate axis labeled with each case.

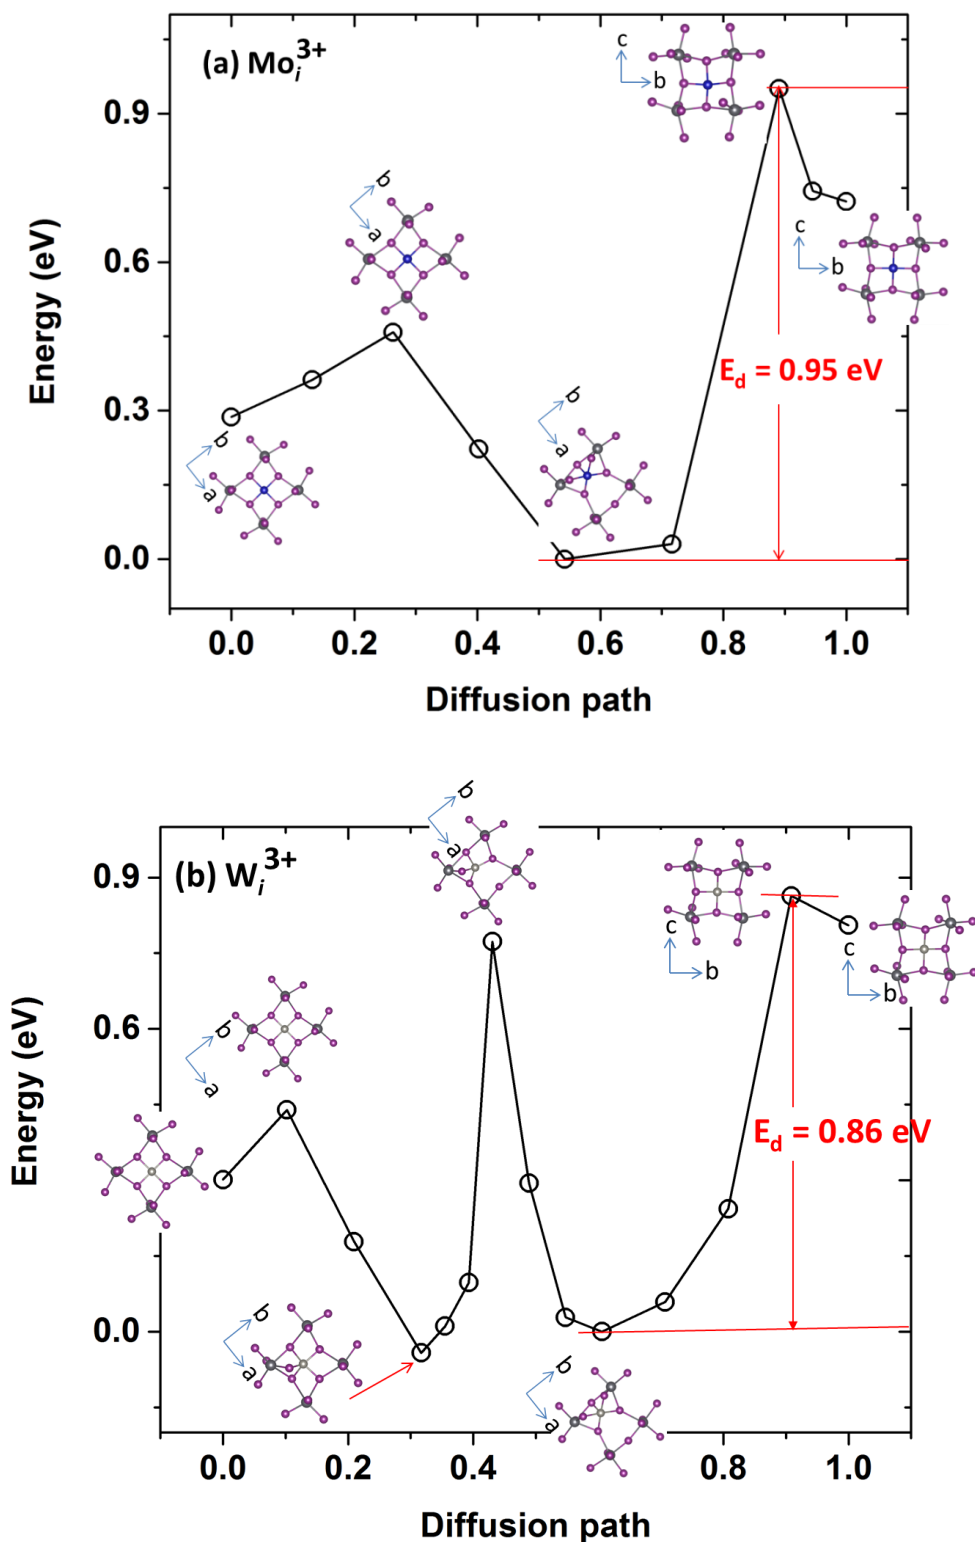

**Figure S3.** Diffusion path and rate limiting barrier  $E_d$  of (a)  $\text{Mo}_i^{3+}$  and (b)  $\text{W}_i^{3+}$ . The local structures around the impurity at its metastable sites and transition state sites along the diffusion path are given in the inset. The corresponding orientations of the structures are provided by the coordinate axis labeled with each case.

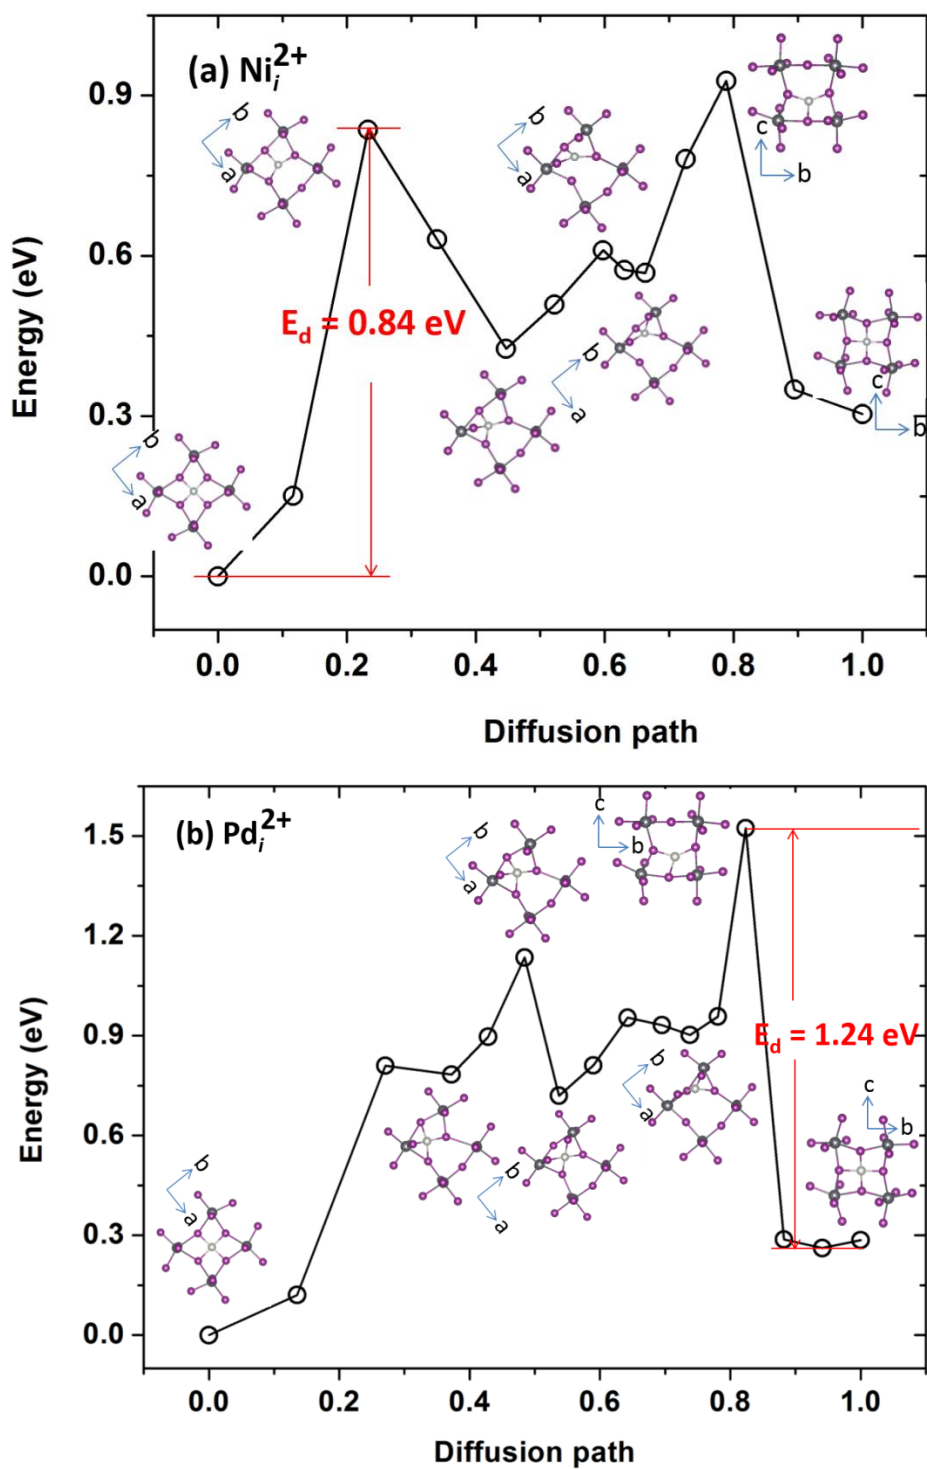

**Figure S4.** Diffusion path and rate limiting barrier  $E_d$  of (a)  $\text{Ni}_i^{2+}$  and (b)  $\text{Pd}_i^{2+}$ . The local structures around the impurity at its metastable sites and transition state sites along the diffusion path are given in the inset. The corresponding orientations of the structures are provided by the coordinate axis labeled with each case.



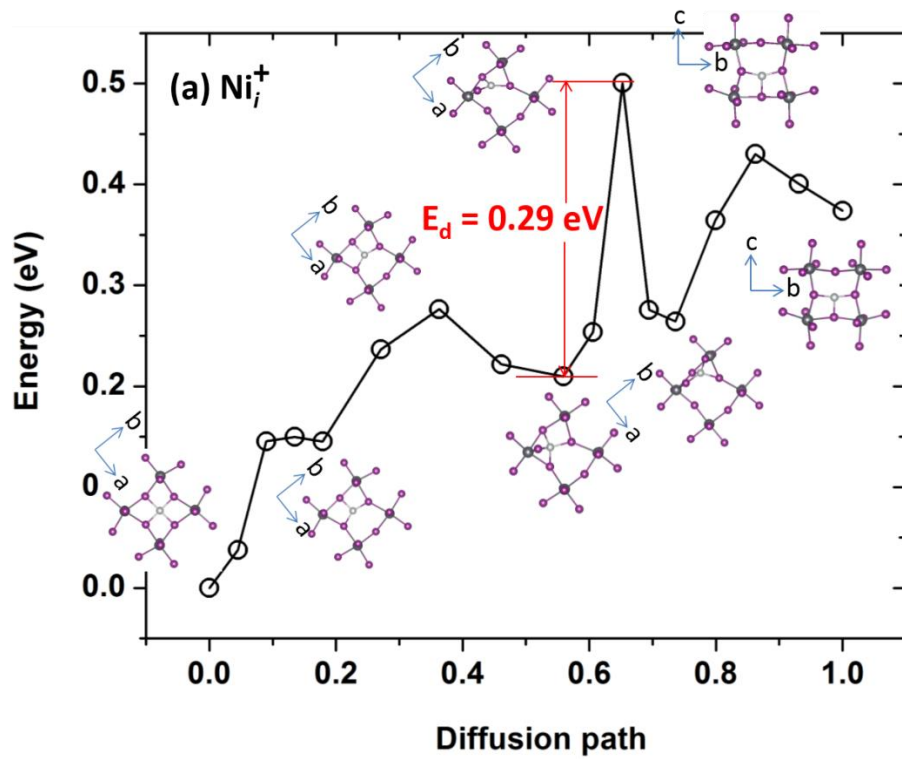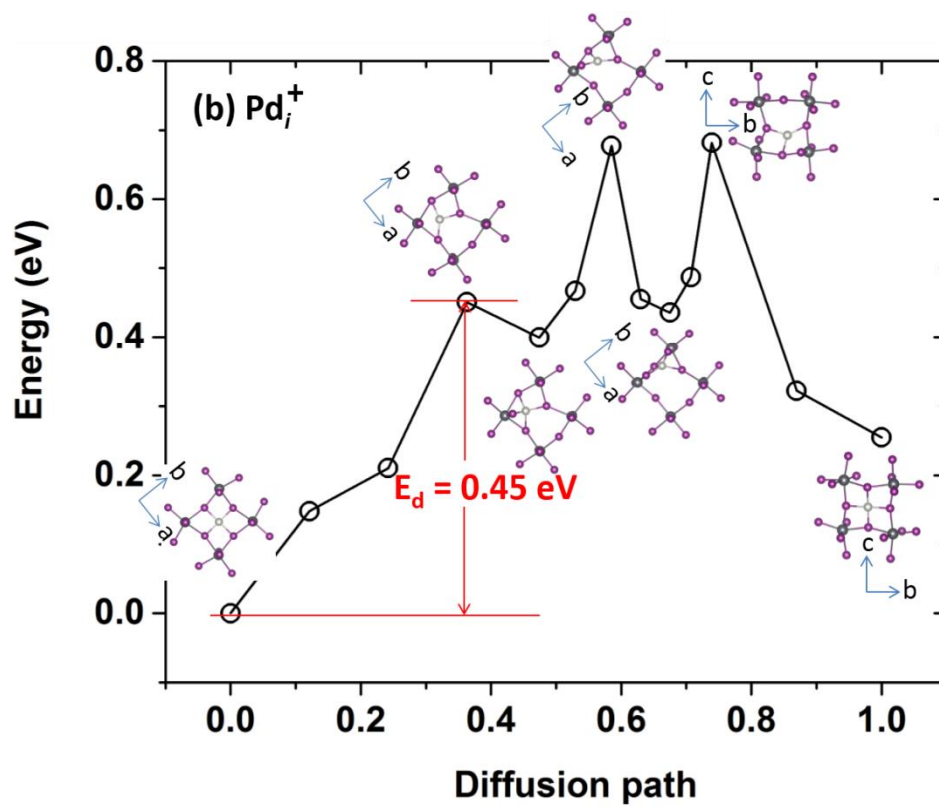

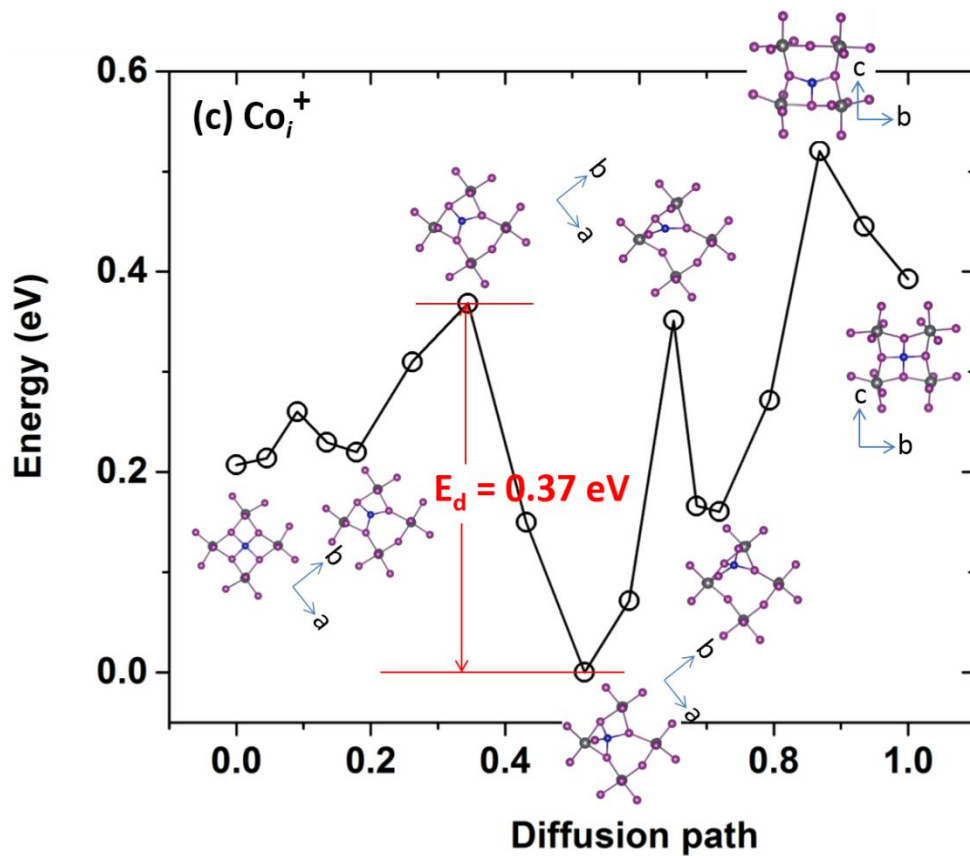

**Figure S5.** Diffusion path and rate limiting barrier  $E_d$  of (a)  $\text{Ni}_i^+$ , (b)  $\text{Pd}_i^+$ , and (c)  $\text{Co}_i^+$ . The local structures around the impurity at its metastable sites and transition state sites along the diffusion path are given in the inset. The corresponding orientations of the structures are provided by the coordinate axis labeled with each case.

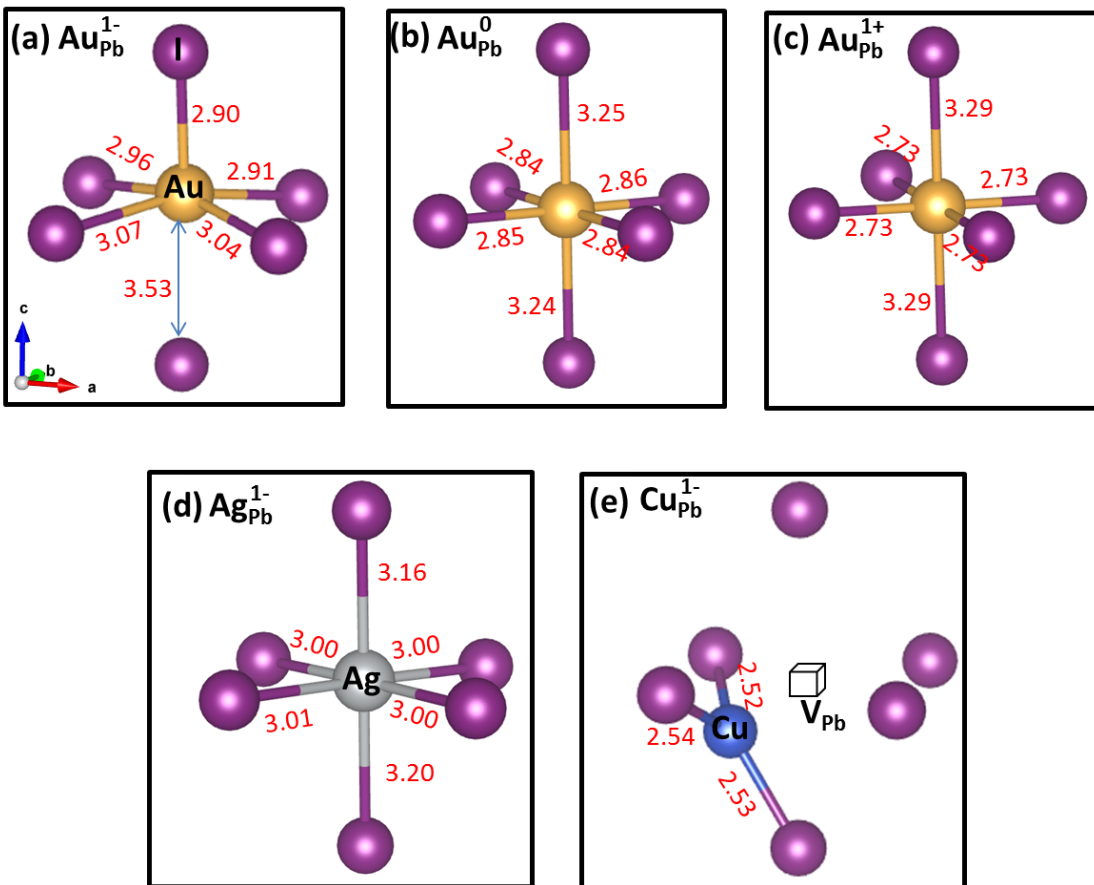

**Figure S6.** Structures of (a)  $\text{Au}_{\text{Pb}}^{1-}$ , (b)  $\text{Au}_{\text{Pb}}^0$ , (c)  $\text{Au}_{\text{Pb}}^{1+}$ , (d)  $\text{Ag}_{\text{Pb}}^{1-}$ , and (e)  $\text{Cu}_{\text{Pb}}^{1-}$ . The numbers (in Å) give the interatomic distances.
